# Supplementary material
Source: publisher figshare collection journal article supplement (https://acs.figshare.com/ndownloader/files/5435303)
Supplement: Supplementary file 1 [file 5435303]

## Supporting Information

### Trust, But Verify II: A Practical Guide to Chemogenomics Data Curation

Denis Fourches<sup>1,\*</sup>, Eugene Muratov<sup>2</sup>, & Alexander Tropsha<sup>2,\*</sup>

<sup>1</sup> Department of Chemistry, Bioinformatics Research Center, North Carolina State University, Raleigh, NC, 27695, USA.

<sup>2</sup> Laboratory for Molecular Modeling, Division of Chemical Biology and Medicinal Chemistry, UNC Eshelman School of Pharmacy, University of North Carolina, Chapel Hill, NC, 27599, USA.

\*please address the correspondence to these authors; emails: [dfourch@ncsu.edu](mailto:dfourch@ncsu.edu) or [alex\\_tropsha@unc.edu](mailto:alex_tropsha@unc.edu)

**Table S1. Distribution of 2D structural duplicates for the NCGC CYP dataset.** Out of 1,280 duplicate couples identified among the 17,000 screened chemicals, 874 pairs of chemicals were reported with biological profile differences ( $\Delta\log\text{AC}_{50} \geq 1$ ). A total of 1,535 discrepancies were found for the 874 couples of duplicates.

|                    | CYP2C9 | CYP1A2 | CYP3A4 | CYP2D6 | CYP2C19 |
|--------------------|--------|--------|--------|--------|---------|
| # of discrepancies | 154    | 363    | 426    | 422    | 170     |
